# Supplementary material for: Overexpression of Two CCCH-type Zinc-Finger Protein Genes Leads to Pollen Abortion in Brassica campestris ssp. chinensis
Source: PubMed Central journal article supplement (PMC7693475; doi:10.3390/genes11111287), 2020-10-29
Supplement: genes-11-01287-s001.pdf [file genes-11-01287-s001.pdf]

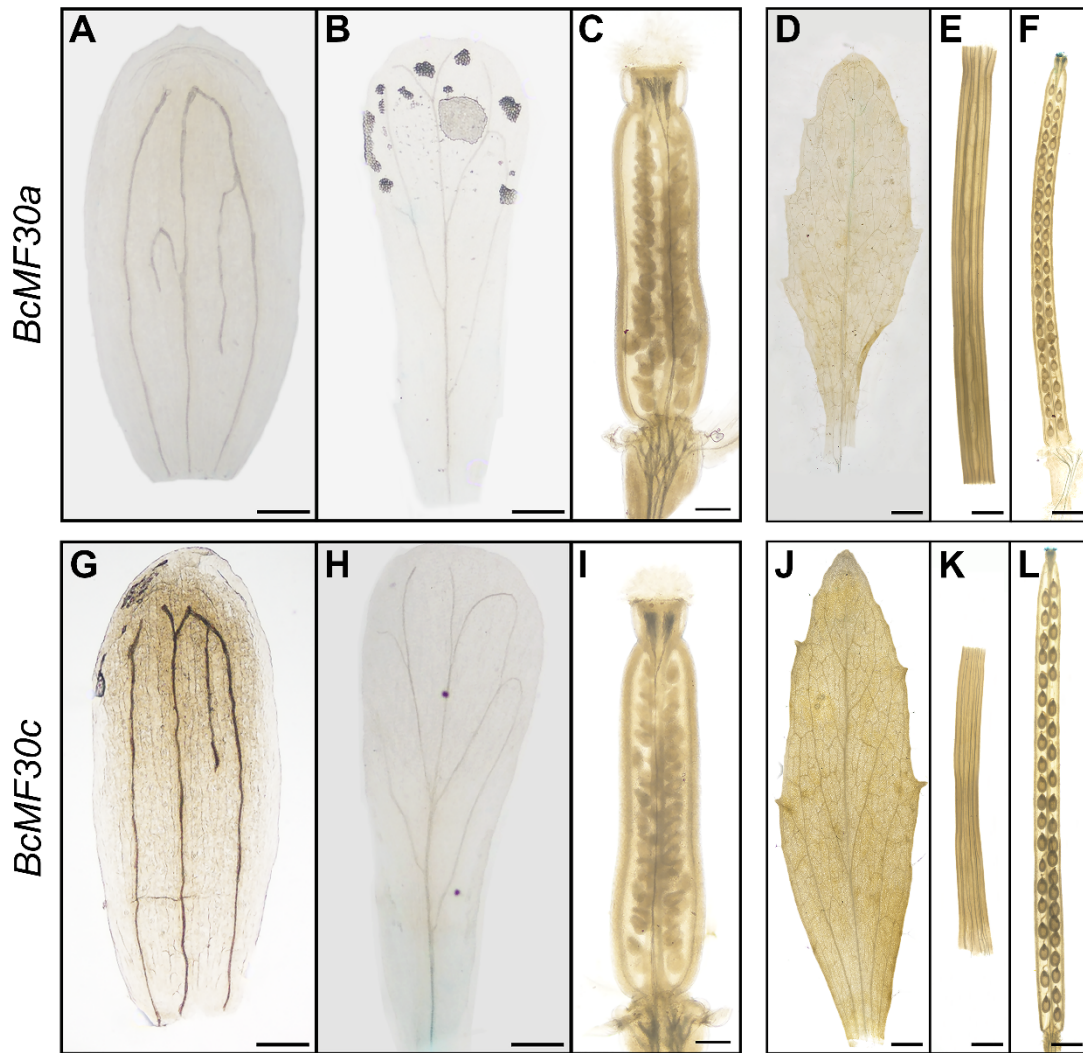

**Figure S1** *BcMF30a* and *BcMF30c* were not expressed in some floral organs and tissues. No GUS signal was observed in the sepal (A,G), petal (B,H), unfertilized pistil (C,I), leaf (D,J), stem (E,K) and silique (F,L) of *ProBcMF30a:GUS* (A–F) and *ProBcMF30c:GUS* (G–L) plants. Bar = 200 μm in (A–C,G–I), 1 mm in (D–F,J–L).

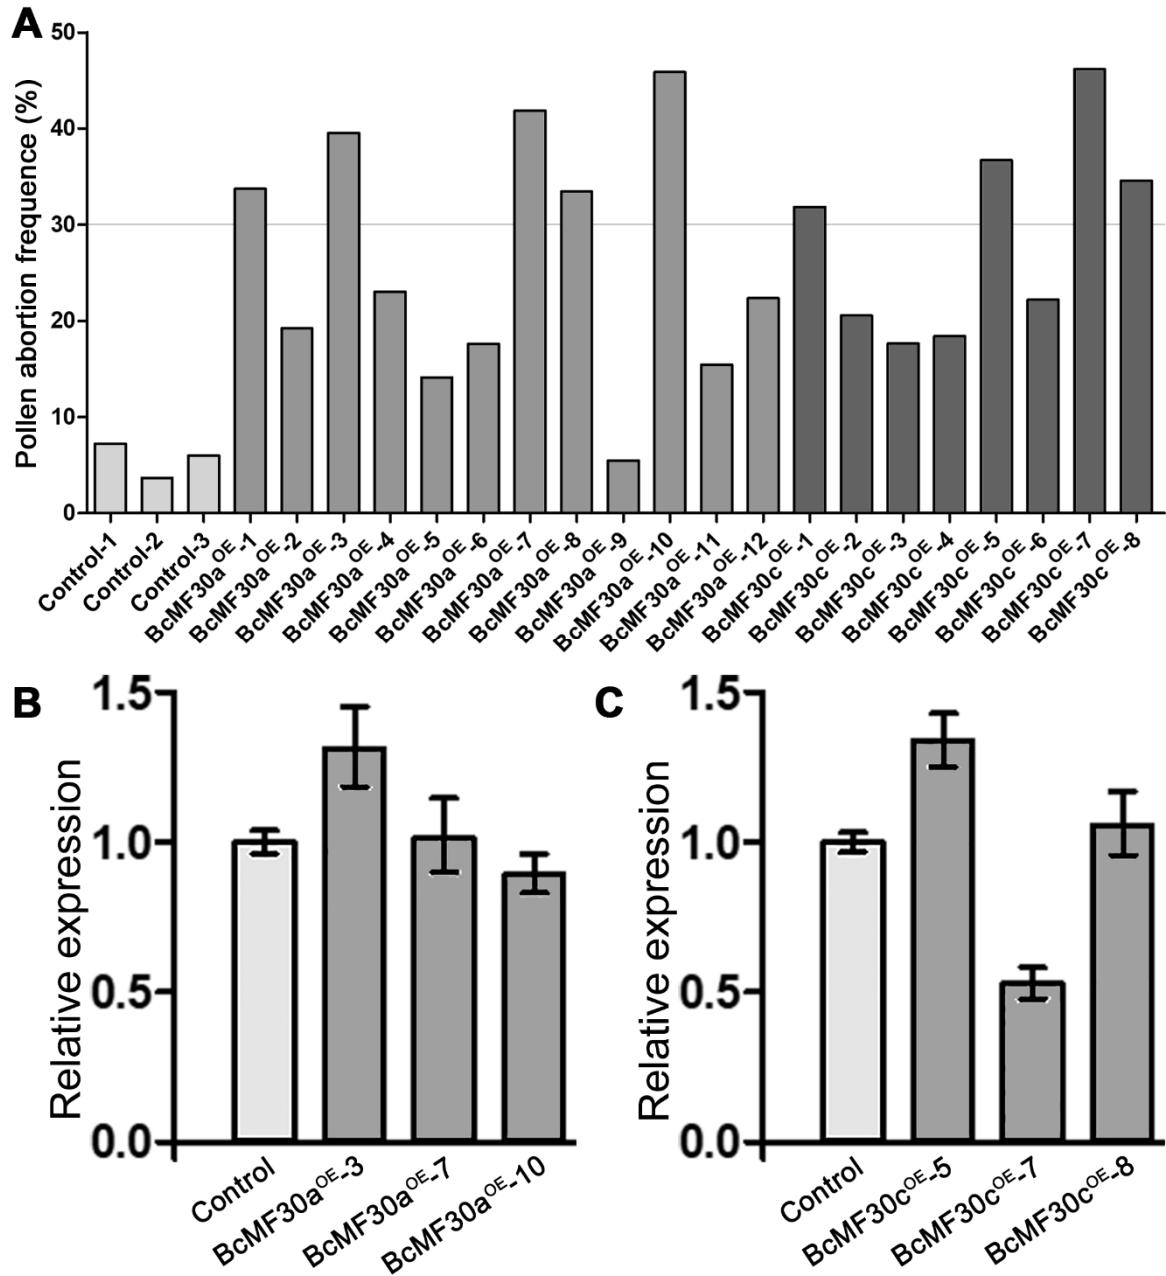

**Figure S2** Analysis of pollen abortion frequency and gene expression levels in *BcMF30a<sup>OE</sup>* and *BcMF30c<sup>OE</sup>* transgenic plants of *Brassica campestris*. (A) The pollen abortion frequency analysis of 12 and 8 positive transgenic T<sub>0</sub> lines of *BcMF30a<sup>OE</sup>* and *BcMF30c<sup>OE</sup>* transgenic plants. qRT-PCR showed the expression of *BcMF30a* (B) and *BcMF30c* (C) in three T<sub>1</sub> lines of *BcMF30a<sup>OE</sup>* and *BcMF30c<sup>OE</sup>* transgenic plants, respectively. Ubiquitously expressed *UBC10* was used as reference gene.

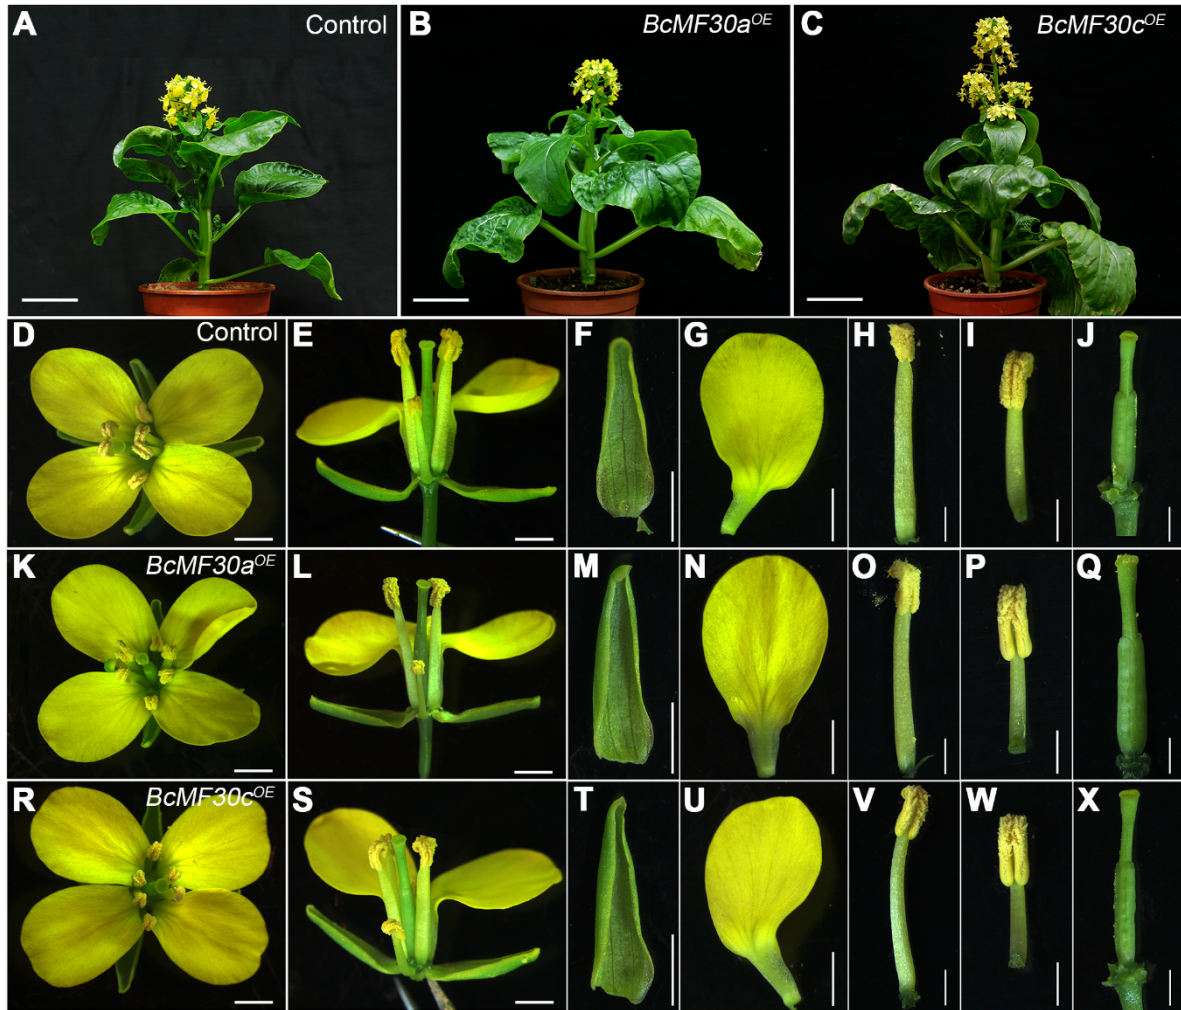

**Figure S3** Morphological observation of plants and floral organs of *BcMF30a<sup>OE</sup>* and *BcMF30c<sup>OE</sup>* transgenic plants of *Brassica campestris*. (A), (B) and (C) showed the plants of control, *BcMF30a<sup>OE</sup>* and *BcMF30c<sup>OE</sup>*, respectively. (D–J), (K–Q) and (R–X) indicated the flower, sepal, petal, stamens and pistil of the control, *BcMF30a<sup>OE</sup>* and *BcMF30c<sup>OE</sup>*, respectively. Bars = 5 cm in (A–C), 2 mm in (D–X).

**Table S1** Sequences of primers used in this study.

| <b>Experiment</b>                 | <b>Primer Name</b> | <b>Sequence-F(5'-3')</b>                     | <b>Sequence-R(5'-3')</b>                     |
|-----------------------------------|--------------------|----------------------------------------------|----------------------------------------------|
| BcMF30a CDS                       | BcMF30a-1F/R       | ATTATTGGAGTCTAGAATGAATTT<br>CACAGAATCGAT     | GACCACCCGGGGATCCCTAGGTAA<br>CTGTCGAAATCTC    |
| BcMF30c CDS                       | BcMF30c-1F/R       | ATTATTAGAGTCTAGAATGAATTT<br>CACAGAATCTATGAAC | GACCACCCGGGGATCCCTATGTAA<br>CTGTTGAAATCTCCTT |
| <i>BcMF30a</i> <sup>OE</sup> Test | BcMF30a-2F/R       | AGGACGGTTGTGCTATCT                           | GGCTTCAAATGGCGTAT                            |
| <i>BcMF30c</i> <sup>OE</sup> Test | BcMF30c-2F/R       | AACGCAATTAATGTGAGTTAGC                       | GGCAAACAAAACCTTGGAGG                         |
| BcMF30a qRT-PCR                   | BcMF30a-3F/R       | ATTGCCACCACGAGTTAGC                          | TCCTGAAGTCATCGGAGAA                          |
| BcMF30c qRT-PCR                   | BcMF30c-3F/R       | TGCCAGCGCGTGTAAGT                            | CCGCATCTGCTGTTAGTTTA                         |
| UBC10 qRT-PCR                     | UBC10-F/R          | GGGTCCTACAGACAGTCCTTAC                       | ATGGAACACCTTCGTCCTAAA                        |
